# Supplementary material
Source: Springer Nature journal article supplement (https://www.springermedizin.de/resource/supplementary/12990_2010_314_MOESM4_ESM.pdf/9613012)

# Injury

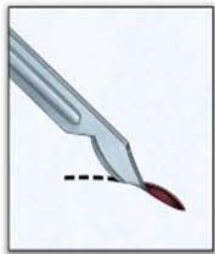

Early

# Inflammation

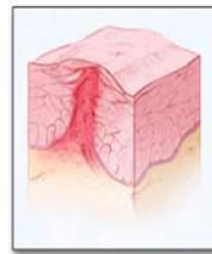

Late

cNOS

NO

iNOS

NO

PAIN

-

+

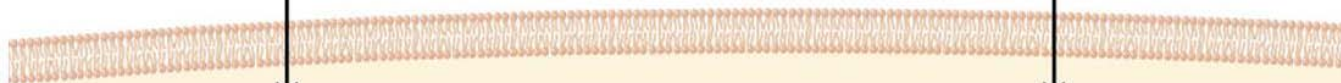

Supplement: MOESM4 [file 9613012]
